# Supplementary material
Source: MDPI journal article supplement (https://www.mdpi.com/1424-2818/13/6/269)
Supplement: s1 [file s1]

## Supplementary Materials

**Table S1.** List of testate amoebae taxa from Sphagnum samples in the thirty-seven western Iberian peatlands studied.

| Testate amoebae taxa                           | Author                                   | Code    |
|------------------------------------------------|------------------------------------------|---------|
| <i>Alabasta longicollis</i>                    | Penard, 1890                             | ALALON  |
| <i>Alabasta militaris</i>                      | Penard, 1890                             | ALAMIL  |
| <i>Amphitrema wrigthianum</i>                  | Archer, 1869                             | AMPWRI  |
| <i>Apodera vas</i>                             | (Certes, 1889) Loeblich & Tappan, 1961   | APOVAS  |
| <i>Arcella discoides</i>                       | Ehrenberg, 1830                          | ARCDIS  |
| <i>Arcella haemisphaerica</i>                  | Perty, 1852                              | ARCHAE  |
| <i>Archerella flavum</i>                       | (Archer, 1877) Loeblich and Tappan, 1961 | ARCHFLA |
| <i>Arcella vulgaris</i>                        | Ehrenberg, 1830                          | ARCVUL  |
| <i>Argynnia dentistoma</i>                     | (Penard, 1890)                           | ARGDEN  |
| <i>Assulina muscorum</i>                       | Greef, 1888                              | ASSMUS  |
| <i>Assulina seminulum</i>                      | (Ehrenberg, 1848)                        | ASSEM   |
| <i>Centropyxis aculeata</i>                    | (Ehrenberg, 1838)                        | CENACU  |
| <i>Centropyxis aerophila</i>                   | Deflandre, 1929                          | CENAER  |
| <i>Centropyxis orbicularis</i>                 | Deflandre, 1929                          | CENORB  |
| <i>Centropyxis constricta</i>                  | (Ehrenberg, 1841) Penard, 1890           | CENCON  |
| <i>Chlathrulina elegans</i> (Heliozoa)         | Claus, 1874                              | CLAELE  |
| <i>Corythion asperulum</i>                     | Schönborn, 1988                          | CORASP  |
| <i>Corythion dubium</i>                        | Taranek, 1871                            | CORDUB  |
| <i>Cryptodiffugia oviformis</i>                | Penard, 1890                             | CRYOVI  |
| <i>Cyphoderia ampulla</i>                      | (Ehrenberg, 1840)                        | CYPAMP  |
| <i>Cryptodiffugia oviformis</i>                | Penard, 1902                             | CRYOVI  |
| <i>Diffugia acuminata</i>                      | Ehrenberg, 1838                          | DIFACU  |
| <i>Diffugia bacillifera</i>                    | Penard, 1890                             | DIFBAC  |
| <i>Diffugia bryophila</i>                      | Penard, 1902                             | DIFBRY  |
| <i>Diffugia globulosa</i>                      | Dujardin, 1837                           | DIFGLO  |
| <i>Diffugia oblonga</i>                        | Ehrenberg, 1838                          | DIFOBL  |
| <i>Diffugia</i> sp. 1                          |                                          | DIFSP1  |
| <i>Euglypha acanthophora</i>                   | (Ehrenberg, 1841)                        | EUGACA  |
| <i>Euglypha brachiata</i>                      | Leidy 1878                               | EUGBRA  |
| <i>Euglypha ciliata</i>                        | (Ehrenberg, 1848)                        | EUGCIL  |
| <i>Euglypha ciliata</i> var <i>glabra</i>      | (Ehrenberg, 1848)                        | EUGGLA  |
| <i>Euglypha ciliata</i> var <i>heterospina</i> | (Ehrenberg, 1848)                        | EUGHET  |
| <i>Euglypha compressa</i>                      | Carter, 1864                             | EUGCOM  |
| <i>Euglypha cristata</i>                       | Leidy, 1874                              | EUGCRI  |
| <i>Euglypha laevis</i>                         | (Ehrenberg, 1845)                        | EUGLAE  |
| <i>Euglypha rotunda</i>                        | Wailes et Penard, 1911                   | EUGROT  |
| <i>Euglypha</i> sp. 1                          |                                          | EUGSP   |
| <i>Euglypha strigosa</i>                       | (Ehrenberg, 1871)                        | EUGSTRI |
| <i>Heleopera petricola</i>                     | Leidy, 1879                              | HELPET  |
| <i>Heleopera rosea</i>                         | Penard, 1890                             | HELROS  |
| <i>Heleopera</i> sp. 1                         |                                          | HELSP1  |
| <i>Heleopera sphagnicola</i>                   | Leidy, 1874                              | HELSPH  |
| <i>Hyalosphenia elegans</i>                    | Leidy, 1874                              | HYAELE  |
| <i>Hyalosphenia papilio</i>                    | Leidy, 1874                              | HYAPAP  |
| <i>Hyalosphenia subflava</i>                   | Cash and Hopkinson, 1909                 | HYASUB  |
| <i>Lesquereusia spiralis</i>                   | (Ehrenberg, 1840)                        | LESSPI  |
| <i>Microcorycia radiata</i>                    | (Brown, 1912) Hopkinson, 1919            | MICRAD  |

|                                      |                                                 |        |
|--------------------------------------|-------------------------------------------------|--------|
| <i>Nebela barbata</i>                | Leidy, 1874                                     | NEBBAR |
| <i>Nebela carinata</i>               | Penard, 1890                                    | NEBCAR |
| <i>Nebela collaris</i>               | (Ehrenberg, 1848) sensu Kosakyan et Gomaa, 2012 | NEBCOL |
| <i>Nebela flabellulum</i>            | (Leidy, 1874)                                   | NEBFLA |
| <i>Nebela tincta</i>                 | (Ehrenberg, 1848) sensu Kosakyan et Gomaa, 2012 | NEBTIN |
| <i>Padaungiella tubulata</i>         | (Brown, 1911) Lara et Todorov, 2012             | PADTUB |
| <i>Phryganella acropodia</i>         | (Hertwig et Lesser, 1874) Hopkinson, 1909       | PHRACR |
| <i>Planocarina marginata</i>         | Penard, 1902                                    | PLAMAR |
| <i>Pyxidicula operculata</i>         | (Agardh, 1827) Ehrenberg, 1838                  | PYXOPE |
| <i>Quadrullella symmetrica</i>       | (Wallich, 1863)                                 | QUESYM |
| <i>Sphenoderia fissirostris tipo</i> | Penard, 1890                                    | SPHFIS |
| <i>Sphenoderia lenta</i>             | Schlumberger, 1845                              | SPHLEN |
| <i>Sphenoderia macrolepis</i>        | Leidy, 1879                                     | SPHMAC |
| <i>Sphenoderia minuta</i>            | Deflandre, 1931                                 | SPHMIN |
| <i>Sphenoderia sp. 1</i>             |                                                 | SPHSP1 |
| <i>Trigonopyxis arcula</i>           | (Leidy, 1879)                                   | TRIARC |
| <i>Trinema complanatum</i>           | Penard, 1890                                    | TRICOM |
| <i>Trinema enchelys</i>              | (Ehrenberg, 1838)                               | TRIENC |
| <i>Trinema lineare</i>               | Penard, 1890                                    | TRILIN |
| <i>Trinema penardi</i>               | Thomas et Chardez, 1958                         | TRIPEN |
| <i>Wailesella eboracensis</i>        | (Wailes et Penard, 1911) Deflandre, 1928        | WAIEBO |

**Table S2.** Diversity and mean relative abundances of testate amoebae from Sphagnum samples with mean abundance greater than 10 % in at least one peatland ecosystem in the thirty-seven peatlands studied in the western Iberian Peninsula.

| Peatland Code | Testate amoeba taxa (%) |        |        |        |        |        |        |        |        |        |        |        |        |         |        |        |        |
|---------------|-------------------------|--------|--------|--------|--------|--------|--------|--------|--------|--------|--------|--------|--------|---------|--------|--------|--------|
|               | CENACU                  | CENAER | NEBCAR | NEBCOL | NEBMIL | NEBLON | HELPET | HELROS | CORDUB | ASSMUS | ASSSEM | TRILIN | EUGROT | EUGSTRI | EUGCOM | PADTUB | MICRAD |
| CA_CF         | 9.47                    | 2.96   | 1.18   | 5.92   | 2.37   | 1.18   | 4.14   | 2.37   | 1.78   | 2.37   | 6.51   | 13.61  | 2.96   | 8.28    | 1.78   | 0.00   | 0.00   |
| CA_QUE        | 9.80                    | 2.45   | 0.49   | 6.37   | 3.43   | 0.49   | 1.96   | 2.94   | 3.43   | 3.43   | 7.35   | 11.76  | 2.94   | 7.35    | 1.96   | 0.00   | 0.00   |
| X_VRRT        | 6.58                    | 3.29   | 0.66   | 7.89   | 3.29   | 0.00   | 5.26   | 4.61   | 3.29   | 1.97   | 7.24   | 5.26   | 3.29   | 5.26    | 1.32   | 0.00   | 0.00   |
| X_TPG         | 4.00                    | 4.67   | 0.67   | 4.00   | 4.00   | 0.00   | 5.33   | 3.33   | 4.67   | 1.33   | 4.67   | 3.33   | 4.00   | 4.67    | 0.67   | 0.00   | 0.00   |
| X_VR          | 4.85                    | 1.82   | 0.61   | 5.45   | 4.24   | 0.00   | 6.67   | 1.82   | 1.82   | 2.42   | 8.48   | 4.24   | 4.85   | 3.03    | 1.82   | 0.00   | 0.00   |
| X_TR          | 4.04                    | 4.17   | 1.16   | 4.17   | 2.09   | 0.00   | 12.51  | 8.34   | 10.04  | 9.54   | 7.73   | 1.04   | 10.43  | 1.04    | 1.04   | 0.00   | 0.00   |
| X_CVM         | 2.80                    | 2.80   | 0.42   | 5.23   | 4.92   | 0.00   | 7.51   | 2.94   | 12.24  | 2.29   | 2.55   | 1.16   | 4.75   | 3.85    | 1.16   | 0.00   | 0.00   |
| X_TF          | 10.19                   | 1.27   | 1.27   | 5.73   | 1.91   | 0.00   | 5.73   | 2.55   | 1.27   | 0.64   | 3.82   | 5.10   | 2.55   | 1.91    | 1.27   | 0.00   | 0.00   |
| X_VT          | 0.00                    | 3.11   | 0.62   | 8.70   | 2.48   | 0.00   | 3.11   | 3.73   | 2.48   | 2.48   | 7.45   | 3.73   | 4.35   | 2.48    | 1.86   | 0.00   | 0.00   |
| ANC_CE1       | 4.80                    | 2.13   | 4.27   | 9.60   | 3.73   | 0.00   | 7.47   | 3.20   | 5.87   | 3.73   | 7.47   | 5.33   | 2.67   | 0.00    | 1.07   | 0.00   | 0.00   |
| LOR_GB        | 0.00                    | 3.83   | 0.00   | 9.36   | 4.68   | 0.00   | 6.38   | 2.98   | 2.55   | 0.00   | 10.64  | 6.38   | 2.55   | 1.28    | 0.00   | 2.55   | 0.00   |
| E_CC          | 8.53                    | 0.00   | 0.78   | 5.43   | 1.55   | 1.55   | 4.65   | 2.33   | 19.38  | 6.20   | 6.20   | 5.43   | 2.33   | 6.20    | 0.00   | 0.00   | 0.00   |
| E_CT          | 9.51                    | 0.00   | 0.68   | 5.43   | 1.36   | 0.68   | 2.72   | 2.72   | 21.06  | 3.91   | 8.32   | 6.11   | 1.36   | 6.11    | 0.00   | 0.00   | 0.00   |
| E_PGU         | 7.74                    | 0.00   | 0.79   | 7.09   | 1.58   | 1.58   | 2.36   | 3.94   | 19.69  | 7.43   | 10.69  | 3.15   | 3.15   | 2.36    | 0.00   | 0.00   | 0.00   |
| E_LS          | 11.20                   | 0.00   | 0.55   | 2.76   | 1.10   | 1.65   | 2.76   | 1.65   | 15.44  | 2.76   | 8.82   | 4.41   | 4.96   | 6.62    | 0.00   | 0.00   | 0.00   |
|               |                         |        |        |        |        |        |        |        |        |        |        |        |        |         |        |        |        |
| X_CL          | 2.55                    | 4.09   | 2.73   | 11.36  | 4.09   | 0.00   | 2.73   | 4.09   | 13.64  | 8.18   | 6.09   | 5.45   | 0.00   | 0.00    | 0.00   | 0.00   | 0.00   |
| X_PC          | 2.60                    | 2.70   | 2.70   | 11.71  | 3.60   | 0.00   | 1.35   | 3.15   | 14.61  | 7.36   | 8.31   | 6.76   | 0.00   | 0.00    | 0.00   | 0.00   | 0.00   |
| TC_PG1        | 0.00                    | 0.00   | 0.00   | 25.00  | 0.00   | 0.00   | 0.00   | 7.69   | 0.00   | 1.92   | 19.23  | 1.92   | 0.00   | 30.77   | 0.00   | 0.00   | 0.00   |
| TC_PG3        | 0.00                    | 0.00   | 0.00   | 30.84  | 0.00   | 0.00   | 0.00   | 5.61   | 0.00   | 6.54   | 19.63  | 0.00   | 0.00   | 29.63   | 0.00   | 0.00   | 0.00   |
| TC_GZ         | 0.00                    | 0.00   | 0.00   | 36.63  | 0.00   | 0.00   | 1.98   | 2.50   | 0.00   | 2.50   | 15.00  | 0.00   | 5.74   | 32.67   | 0.00   | 0.00   | 0.00   |
| BO_B32        | 2.73                    | 16.36  | 0.00   | 36.36  | 0.00   | 0.00   | 0.00   | 3.64   | 1.82   | 0.00   | 0.00   | 0.91   | 10.91  | 0.00    | 0.00   | 0.00   | 0.00   |
| BO_RA31       | 0.00                    | 0.00   | 0.00   | 41.96  | 0.00   | 0.00   | 7.14   | 3.57   | 20.54  | 0.00   | 0.00   | 10.71  | 0.00   | 0.00    | 0.00   | 0.00   | 0.00   |
| SU_C19        | 3.25                    | 9.79   | 11.35  | 9.09   | 4.41   | 0.00   | 14.50  | 2.52   | 0.00   | 18.91  | 3.04   | 1.30   | 1.95   | 0.00    | 3.15   | 0.00   | 0.00   |
| SU_C21        | 3.73                    | 10.45  | 6.83   | 7.45   | 7.45   | 0.00   | 9.32   | 4.35   | 0.00   | 16.15  | 6.94   | 2.48   | 1.24   | 0.00    | 0.62   | 0.00   | 0.00   |
| SU_C26        | 2.17                    | 8.25   | 10.14  | 15.22  | 1.45   | 0.00   | 17.39  | 1.45   | 0.00   | 12.32  | 2.62   | 3.62   | 2.17   | 0.00    | 1.45   | 0.00   | 0.00   |
| SU_C32        | 1.73                    | 7.67   | 4.62   | 23.70  | 0.00   | 0.00   | 8.36   | 5.20   | 0.00   | 17.92  | 5.36   | 1.16   | 3.47   | 0.00    | 0.00   | 0.00   | 0.00   |
| AG_V10        | 0.00                    | 19.00  | 0.00   | 23.00  | 0.00   | 0.00   | 0.00   | 0.00   | 0.00   | 21.00  | 5.00   | 0.00   | 8.00   | 16.00   | 0.00   | 0.00   | 0.00   |
| LIR_VB124     | 0.00                    | 0.00   | 0.00   | 29.52  | 0.00   | 0.00   | 23.86  | 8.57   | 22.29  | 6.67   | 2.86   | 0.00   | 1.90   | 0.00    | 0.00   | 0.00   | 0.00   |
| LIR_VD129     | 1.87                    | 0.00   | 0.00   | 42.06  | 10.28  | 0.00   | 0.00   | 2.80   | 20.00  | 6.17   | 5.61   | 0.00   | 0.00   | 0.00    | 0.00   | 0.00   | 0.00   |
| LIR_VC32      | 0.00                    | 13.19  | 0.00   | 12.09  | 1.10   | 0.00   | 8.79   | 2.20   | 15.38  | 9.89   | 3.30   | 0.00   | 0.00   | 16.48   | 0.00   | 0.00   | 0.00   |
|               |                         |        |        |        |        |        |        |        |        |        |        |        |        |         |        |        |        |
| BA_118.2      | 1.62                    | 27.60  | 0.00   | 1.62   | 0.00   | 0.00   | 11.37  | 0.00   | 0.00   | 1.62   | 0.81   | 2.44   | 7.31   | 26.79   | 2.44   | 0.00   | 0.00   |
| BA_118.3      | 0.76                    | 25.18  | 0.00   | 0.76   | 0.00   | 0.00   | 12.97  | 0.00   | 0.00   | 6.87   | 1.53   | 6.87   | 4.58   | 22.89   | 0.76   | 0.00   | 0.00   |
| BA_118.6      | 3.17                    | 33.26  | 0.00   | 2.38   | 0.00   | 0.00   | 9.50   | 0.00   | 0.00   | 3.17   | 0.79   | 6.34   | 2.38   | 22.18   | 1.58   | 0.00   | 0.00   |
| BA_118.7      | 4.62                    | 15.40  | 0.00   | 1.54   | 0.00   | 0.00   | 11.55  | 0.00   | 0.00   | 5.39   | 0.77   | 4.62   | 8.47   | 22.33   | 5.39   | 0.00   | 0.00   |
| CO_AIC        | 0.00                    | 51.92  | 0.00   | 5.77   | 0.00   | 0.00   | 0.00   | 11.54  | 20.19  | 2.88   | 0.96   | 0.00   | 0.00   | 0.00    | 0.00   | 0.00   | 0.00   |
|               |                         |        |        |        |        |        |        |        |        |        |        |        |        |         |        |        |        |
| AG_G5         | 0.00                    | 0.00   | 21.00  | 0.00   | 30.00  | 0.00   | 0.00   | 0.00   | 0.00   | 0.00   | 16.00  | 0.00   | 7.00   | 0.00    | 17.00  | 0.00   | 0.00   |
| CO_PL         | 0.00                    | 5.13   | 3.20   | 0.00   | 0.00   | 12.65  | 0.00   | 0.00   | 0.00   | 2.56   | 0.00   | 0.00   | 4.49   | 0.00    | 0.00   | 11.53  | 10.25  |

**Table S3.** Mean water chemistry data, functional groups and diversity of testate amoeba of the studied Iberian peatlands.

| Peatlands<br>Code | pH   | Electrical<br>Conductivity | Calcium                | Magnesium              | Nitrate                | Nitrite                | Ammonium               | DIN                    | Phosphates             | Anthropized<br>Area | Shannon<br>Index | Mixotrophic | r-Strategists | K-Strategists | Indifferent | L:F<br>ratio |
|-------------------|------|----------------------------|------------------------|------------------------|------------------------|------------------------|------------------------|------------------------|------------------------|---------------------|------------------|-------------|---------------|---------------|-------------|--------------|
|                   |      | ( $\mu\text{S cm}^{-1}$ )  | ( $\text{mg l}^{-1}$ ) | ( $\text{mg l}^{-1}$ ) | ( $\text{mg l}^{-1}$ ) | ( $\text{mg l}^{-1}$ ) | ( $\text{mg l}^{-1}$ ) | ( $\text{mg l}^{-1}$ ) | ( $\text{mg l}^{-1}$ ) | (%)                 |                  |             |               |               |             |              |
| CA_CF             | 5.88 | 64.20                      | 2.27                   | 3.00                   | 0.61                   | 0.35                   | 0.24                   | 1.20                   | 0.04                   | 58.6                | 3.16             | 5.92        | 34.32         | 31.36         | 28.40       | 0.91         |
| CA_QUE            | 6.79 | 66.00                      | 3.69                   | 3.20                   | 1.47                   | 0.27                   | 0.06                   | 1.80                   | 0.03                   | 47.6                | 3.14             | 6.86        | 35.78         | 31.78         | 25.57       | 0.89         |
| X_VRRT            | 5.32 | 76.10                      | 1.13                   | 0.79                   | 0.77                   | 0.02                   | 0.08                   | 0.88                   | 0.01                   | 7.6                 | 3.44             | 3.29        | 35.53         | 32.24         | 28.95       | 0.91         |
| X_TPG             | 4.66 | 44.81                      | 1.52                   | 0.64                   | 2.56                   | 0.03                   | 0.08                   | 2.67                   | 0.05                   | 5.0                 | 3.39             | 9.33        | 34.00         | 37.25         | 19.41       | 1.10         |
| X_VR              | 4.44 | 48.00                      | 1.17                   | 0.73                   | 0.47                   | 0.04                   | 0.06                   | 0.58                   | 0.06                   | 5.0                 | 3.45             | 4.24        | 40.00         | 35.76         | 20.00       | 0.89         |
| X_TR              | 5.01 | 66.30                      | 2.19                   | 1.04                   | 0.62                   | 0.03                   | 0.09                   | 0.74                   | 0.08                   | 5.0                 | 2.82             | 3.13        | 17.96         | 24.25         | 54.67       | 1.35         |
| X_CVM             | 4.09 | 81.62                      | 0.56                   | 0.47                   | 0.36                   | 0.04                   | 0.06                   | 0.46                   | 0.03                   | 5.0                 | 3.55             | 9.09        | 31.68         | 28.31         | 30.91       | 0.89         |
| X_TF              | 4.38 | 29.80                      | 0.16                   | 0.28                   | 0.03                   | 0.04                   | 0.05                   | 0.13                   | 0.01                   | 5.0                 | 3.40             | 10.19       | 31.85         | 38.79         | 19.17       | 1.22         |
| X_VT              | 4.98 | 61.40                      | 2.20                   | 0.89                   | 0.38                   | 0.02                   | 0.06                   | 0.46                   | 0.05                   | 5.0                 | 3.34             | 3.73        | 38.51         | 41.20         | 16.56       | 1.07         |
| X_CL              | 3.91 | 72.35                      | 0.36                   | 0.58                   | 0.31                   | 0.02                   | 0.07                   | 0.41                   | 0.03                   | 5.0                 | 2.96             | 11.36       | 30.45         | 40.94         | 17.24       | 1.34         |
| X_PC              | 4.00 | 70.74                      | 0.28                   | 0.45                   | 0.35                   | 0.03                   | 0.06                   | 1.00                   | 0.04                   | 5.0                 | 2.93             | 10.81       | 30.63         | 24.77         | 33.78       | 0.81         |
| TC_PG1            | 3.90 | 75.70                      | 4.39                   | 0.52                   | 0.67                   | 0.04                   | 0.21                   | 0.92                   | 0.09                   | 15.2                | 1.77             | 2.88        | 34.62         | 36.54         | 25.96       | 1.06         |
| TC_PG3            | 4.09 | 50.60                      | 3.81                   | 0.14                   | 0.57                   | 0.03                   | 0.23                   | 0.83                   | 0.04                   | 12.8                | 1.72             | 15.89       | 19.63         | 40.43         | 24.06       | 2.06         |
| TC_GZ             | 5.60 | 108.72                     | 2.32                   | 0.82                   | 0.10                   | 0.03                   | 0.15                   | 0.28                   | 0.06                   | 81.4                | 1.28             | 0.00        | 58.42         | 38.56         | 3.03        | 0.66         |
| CO_ALC            | 6.40 | 121.60                     | 1.34                   | 1.11                   | 1.40                   | 0.02                   | 0.39                   | 1.81                   | 0.02                   | 100                 | 1.45             | 0.00        | 20.19         | 61.56         | 18.25       | 3.05         |
| CO_PL             | 5.63 | 26.10                      | 0.60                   | 0.49                   | 0.24                   | 0.31                   | 0.11                   | 0.66                   | 0.03                   | 100                 | 2.69             | 0.00        | 14.10         | 42.45         | 43.45       | 3.01         |
| BO_B32            | 5.38 | 34.10                      | 1.04                   | 0.34                   | 0.18                   | 0.02                   | 0.06                   | 0.26                   | 0.03                   | 19.7                | 2.15             | 0.00        | 21.82         | 64.22         | 13.96       | 2.94         |
| BO_RA31           | 5.31 | 23.40                      | 0.57                   | 0.40                   | 0.09                   | 0.03                   | 0.03                   | 0.15                   | 0.05                   | 26.2                | 1.76             | 0.00        | 39.29         | 45.57         | 15.15       | 1.16         |
| BA_118.2          | 5.23 | 40.10                      | 0.43                   | 0.30                   | 0.91                   | 0.02                   | 0.08                   | 1.01                   | 0.03                   | 35.7                | 2.16             | 0.00        | 43.84         | 42.78         | 13.38       | 0.98         |
| BA_118.3          | 5.20 | 37.70                      | 0.46                   | 0.41                   | 0.18                   | 0.03                   | 0.20                   | 0.41                   | 0.05                   | 41.3                | 2.22             | 0.00        | 37.39         | 40.73         | 21.88       | 1.09         |
| BA_118.6          | 4.84 | 111.60                     | 1.36                   | 1.11                   | 0.12                   | 0.08                   | 0.03                   | 0.22                   | 0.03                   | 37.6                | 2.15             | 0.00        | 36.43         | 50.42         | 13.14       | 1.38         |

|              |            |            |             |             |             |             |             |             |             |          |             |       |       |       |       |       |
|--------------|------------|------------|-------------|-------------|-------------|-------------|-------------|-------------|-------------|----------|-------------|-------|-------|-------|-------|-------|
| BA_118.7     | 4.77       | 61.00      | 0.58        | 0.54        | 0.22        | 0.02        | 0.03        | 0.26        | 0.03        | 23.8     | 2.41        | 0.00  | 46.20 | 35.87 | 17.93 | 0.78  |
| ANC_CE1      | 6.11       | 73.67      | 0.76        | 0.63        | 0.21        | 0.03        | 0.06        | 0.30        | 0.05        | 5.0      | 3.20        | 4.80  | 21.34 | 34.76 | 39.11 | 1.63  |
| SU_C19       | 4.58       | 34.10      | 0.51        | 0.11        | 0.09        | 0.05        | 0.05        | 0.18        | 0.04        | 14.8     | 2.64        | 2.52  | 13.47 | 43.59 | 40.42 | 3.24  |
| SU_C21       | 4.52       | 8.82       | 0.41        | 0.05        | 0.06        | 0.02        | 0.06        | 0.14        | 0.05        | 9.6      | 2.74        | 0.00  | 11.18 | 44.83 | 43.99 | 4.01  |
| SU_C26       | 4.93       | 22.50      | 0.60        | 0.18        | 0.29        | 0.02        | 0.04        | 0.35        | 0.03        | 7.3      | 2.59        | 0.00  | 12.32 | 46.48 | 41.20 | 3.77  |
| SU_C32       | 4.92       | 20.80      | 0.47        | 0.17        | 2.80        | 0.09        | 0.03        | 2.92        | 0.03        | 5.0      | 2.46        | 0.00  | 13.87 | 48.14 | 37.99 | 3.47  |
| AG_G5        | 5.12       | 47.20      | 1.61        | 0.40        | 0.77        | 0.02        | 0.03        | 0.81        | 0.06        | 86.4     | 1.69        | 9.00  | 24.00 | 51.00 | 16.00 | 2.13  |
| AG_V10       | 4.66       | 56.40      | 1.37        | 0.53        | 3.98        | 0.02        | 0.10        | 4.10        | 0.04        | 77.3     | 1.83        | 0.00  | 32.00 | 42.00 | 26.00 | 1.31  |
| LOR_GB       | 6.70       | 92.65      | 1.27        | 1.12        | 0.15        | 0.04        | 0.03        | 0.22        | 0.05        | 43.8     | 1.88        | 10.48 | 19.05 | 29.52 | 40.95 | 1.55  |
| LIR_VB124    | 6.45       | 325.00     | 6.32        | 7.17        | 0.50        | 0.58        | 0.02        | 1.10        | 0.08        | 33.5     | 3.32        | 5.96  | 25.53 | 35.39 | 33.12 | 1.39  |
| LIR_VD129    | 5.41       | 265.00     | 8.63        | 8.57        | 0.40        | 0.02        | 0.06        | 0.48        | 0.08        | 5.0      | 1.63        | 0.00  | 4.67  | 54.21 | 41.12 | 11.60 |
| LIR_VC32     | 5.43       | 42.20      | 0.39        | 0.31        | 0.46        | 0.04        | 0.06        | 0.57        | 0.06        | 12.6     | 2.32        | 8.79  | 31.87 | 30.77 | 28.57 | 0.97  |
| E_CC         | 4.97       | 38.20      | 0.36        | 0.27        | 0.05        | 0.02        | 0.03        | 0.10        | 0.03        | 0.0      | 2.83        | 2.33  | 48.84 | 25.58 | 23.26 | 0.52  |
| E_CT         | 5.03       | 40.63      | 0.42        | 0.31        | 0.04        | 0.03        | 0.03        | 0.10        | 0.04        | 0.0      | 2.76        | 2.04  | 50.95 | 32.21 | 14.80 | 0.63  |
| E_PGU        | 4.81       | 29.46      | 0.28        | 0.22        | 0.03        | 0.02        | 0.04        | 0.09        | 0.05        | 0.0      | 2.79        | 1.58  | 44.90 | 31.08 | 22.45 | 0.69  |
| E_LS         | 5.12       | 36.21      | 0.40        | 0.35        | 0.05        | 0.03        | 0.05        | 0.13        | 0.03        | 0.0      | 2.85        | 5.88  | 51.28 | 28.85 | 13.99 | 0.56  |
| Total ranges | 3.9 – 6.79 | 8.82 - 325 | 0.16 – 8.63 | 0.05 – 8.57 | 0.03 - 3.98 | 0.02 - 0.58 | 0.02 - 0.39 | 0.09 - 4.10 | 0.01 - 0.09 | 0.0 -100 | 1.28 – 3.54 |       |       |       |       |       |

**Table S4.** Spearman's correlation coefficients for the environmental variables and testate functional groups of the Western Iberian peatlands. Student's t-test was used to indicate statistically significant correlations (p-value < 0.05 \* (orange); < 0.1 \*\* (yellow)).

[illegible]
